# Supplementary material
Source: HighWire-hosted journal article supplement (https://openres.ersjournals.com/content/9/1/00217-2022)
Supplement: inline-supplementary-material-1 [file inline-supplementary-material-1.pdf]

Online supplementary table 1. Diagnoses and corresponding ICD-10 codes used to characterize the causes of hospital admission following the index event

|                                                                                          | <b>ICD-10 code</b>  |
|------------------------------------------------------------------------------------------|---------------------|
| Infections and parasitic diseases                                                        | A00-B99             |
| Neoplasms                                                                                | C00-D48             |
| Hematologic, immunogenic diseases                                                        | D50-D89             |
| Endocrine, nutritional, metabolic diseases                                               | E00-E90             |
| Mental and behavioral disorders                                                          | F00-F99             |
| Diseases of the nervous system                                                           | G00-G99             |
| Diseases of the eye and adnexa                                                           | H00-H59             |
| Diseases of the ear and mastoid                                                          | H60-H95             |
| Diseases of the circulatory system                                                       | I00-I99             |
| Diseases of the respiratory system                                                       | J00-J99             |
| Diseases of the digestive system                                                         | K00-K93             |
| Diseases of the skin and subcutaneous tissue                                             | L00-L99             |
| Diseases of the musculoskeletal system and connective tissue                             | M00-M99             |
| Diseases of the genitourinary system                                                     | N00-N99             |
| Pregnancy, childbirth and the puerperium                                                 | O00-O99             |
| Conditions originating in the perinatal period                                           | P00-P96             |
| Congenital malformations, deformations, and chromosomal abnormalities                    | Q00-Q99             |
| Symptoms, signs, and abnormal clinical and laboratory findings, not elsewhere classified | R00-R99             |
| Trauma and accidents                                                                     | S00-T98,<br>X00-X99 |
| Factors influencing health status and contact with health services                       | Z00-Z99             |
